# Supplementary material for: Explaining sustainable purchase behavior in online flight booking—combining value-belief-norm model and theory of planned behavior
Source: Springer Nature journal article supplement (doi:10.1007/s11612-024-00735-7), 2024-04-25

# YOUR ITINERARY AT A GLANCE

Almost ready for take-off – but before we think you should know, that we're doing our utmost to make your travels as sustainable as possible. But we need your support for this.

All information on **SAF** can be found here:

[Here](#)

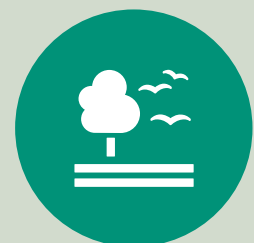

ORIG. TRIP  
**FRA**

 **SEOUL, SOUTH KOREA**

# SEOUL

**SOUTH KOREA**

| FLIGHT NO.   | DATE         |
|--------------|--------------|
| <b>LH712</b> | <b>MAR23</b> |

**90-46-28**

---

**SEOUL**

**90-46-28**

Certainly you know about the increased pollution through emissions during air travel.

But do you also know which factors impact the amounts of emissions the most?

The biggest influences you can find in the following overview:

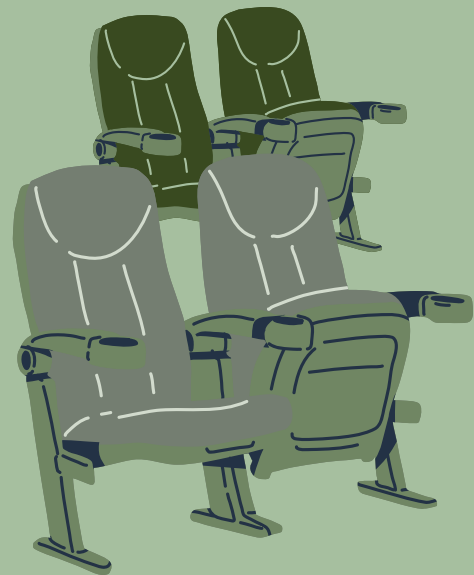

travel class

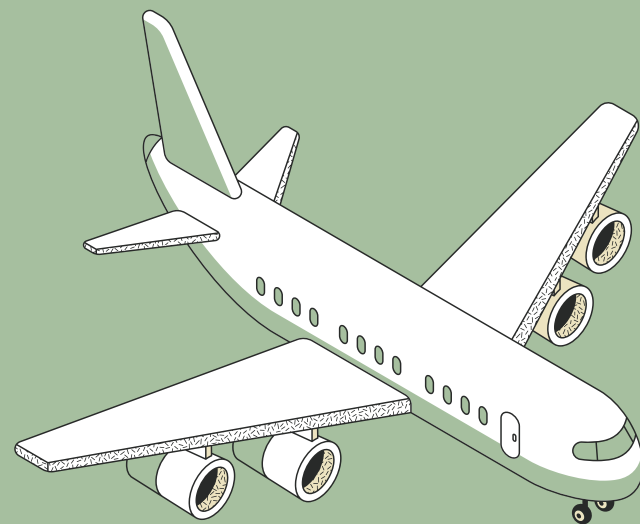

aircraft type

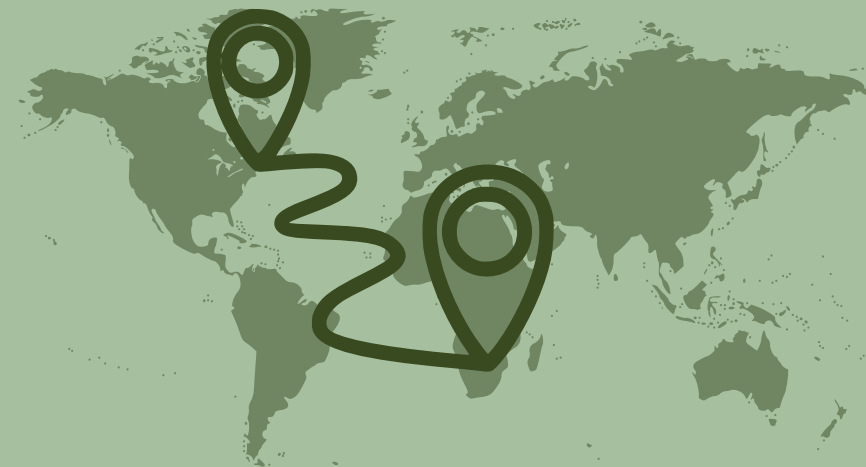

flight kilometers

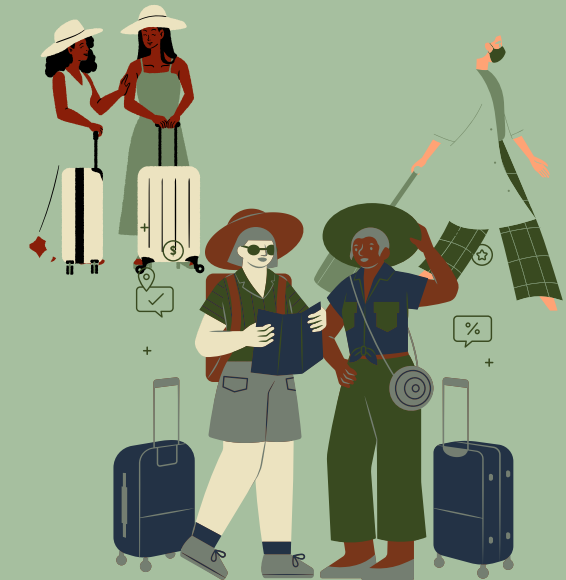

seat load factor

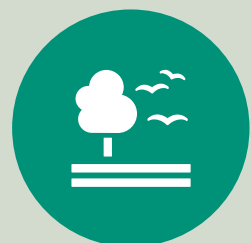

[Learn more](#)

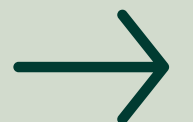

# SUSTAINABLE AVIATION FUEL - what does that actually mean?

01

SAF is seen as a key element for the aviation industry in looking into a more sustainable future of air travel. Nowadays the price per ton for SAF is **2-3x** as high as for regular jet fuel.

02

According to the International Air Transportation Association (IATA) SAF production in 2021 summed up to around 100 million litre - this is only 0.03% of the total global demand for jet fuel.

03

To scale SAF production and make more available of the biofuels, the aviation industry is joining forces and is highly invested in research on the topic. Be it from the classic approach of using waste feedstock or new sun-to-liquid technologies, we strive towards making air travel more sustainable.

**It's your turn!**

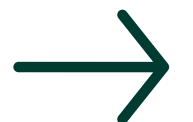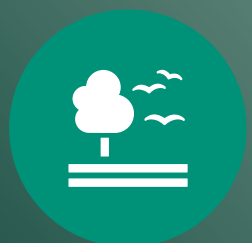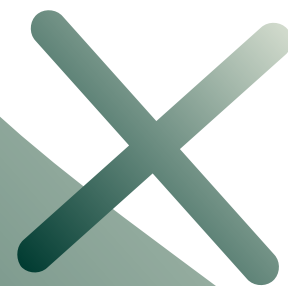

## Your itinerary at a glance

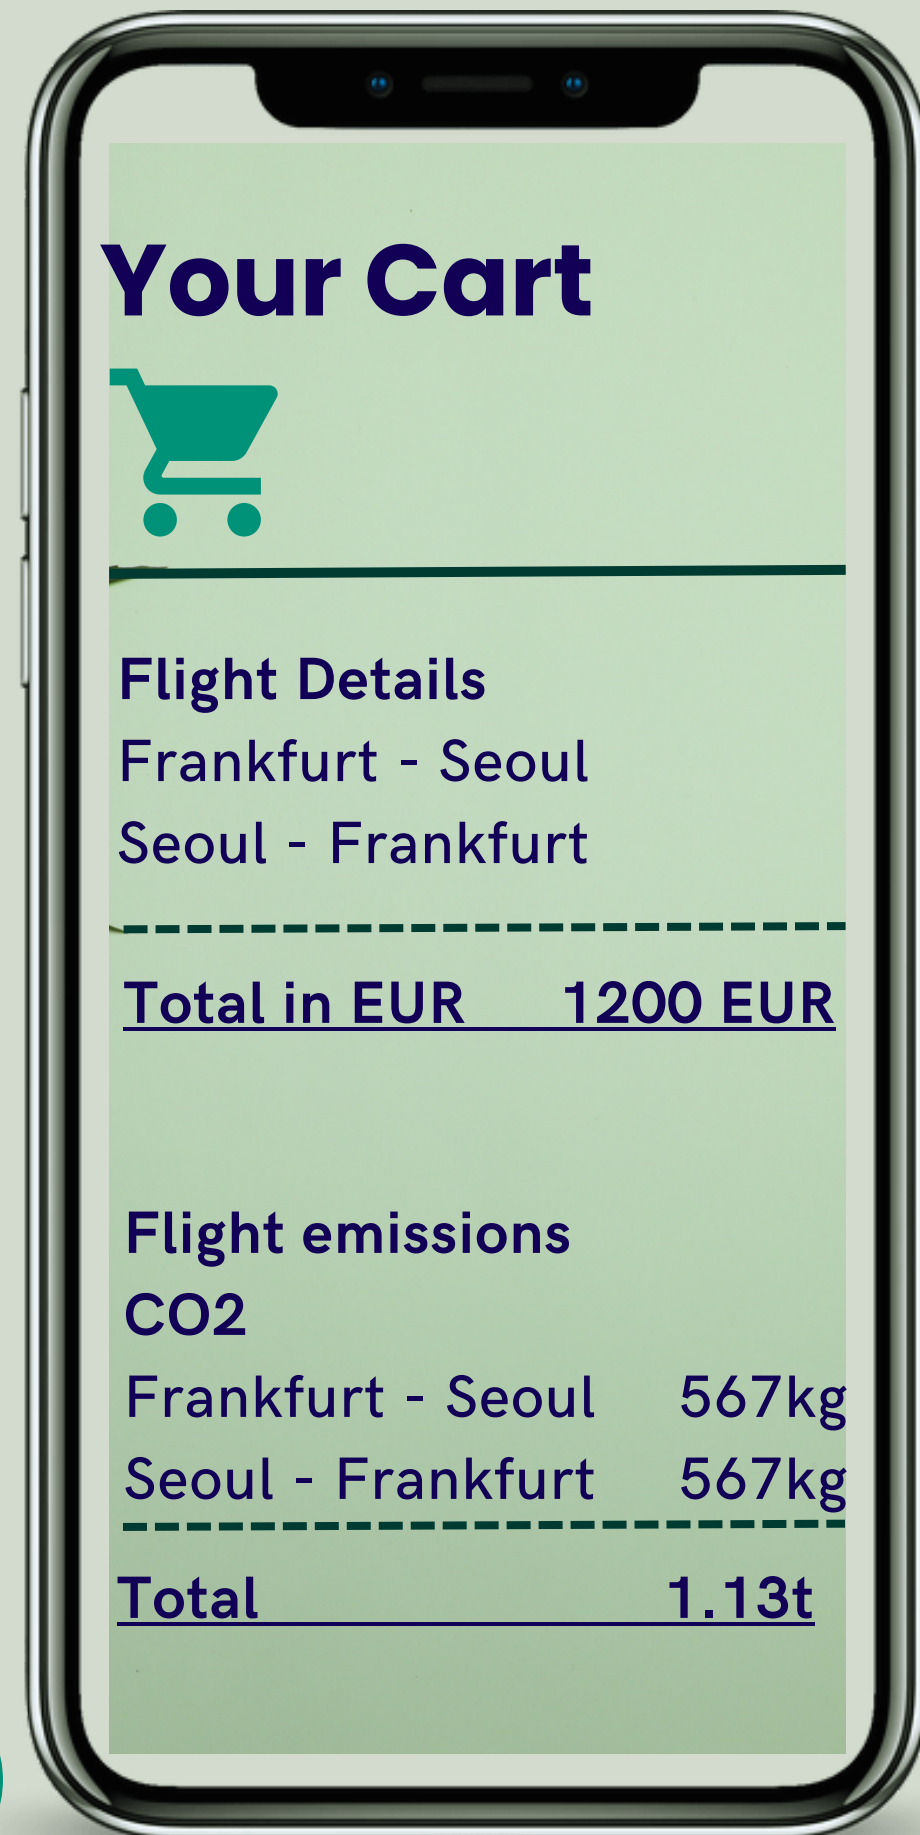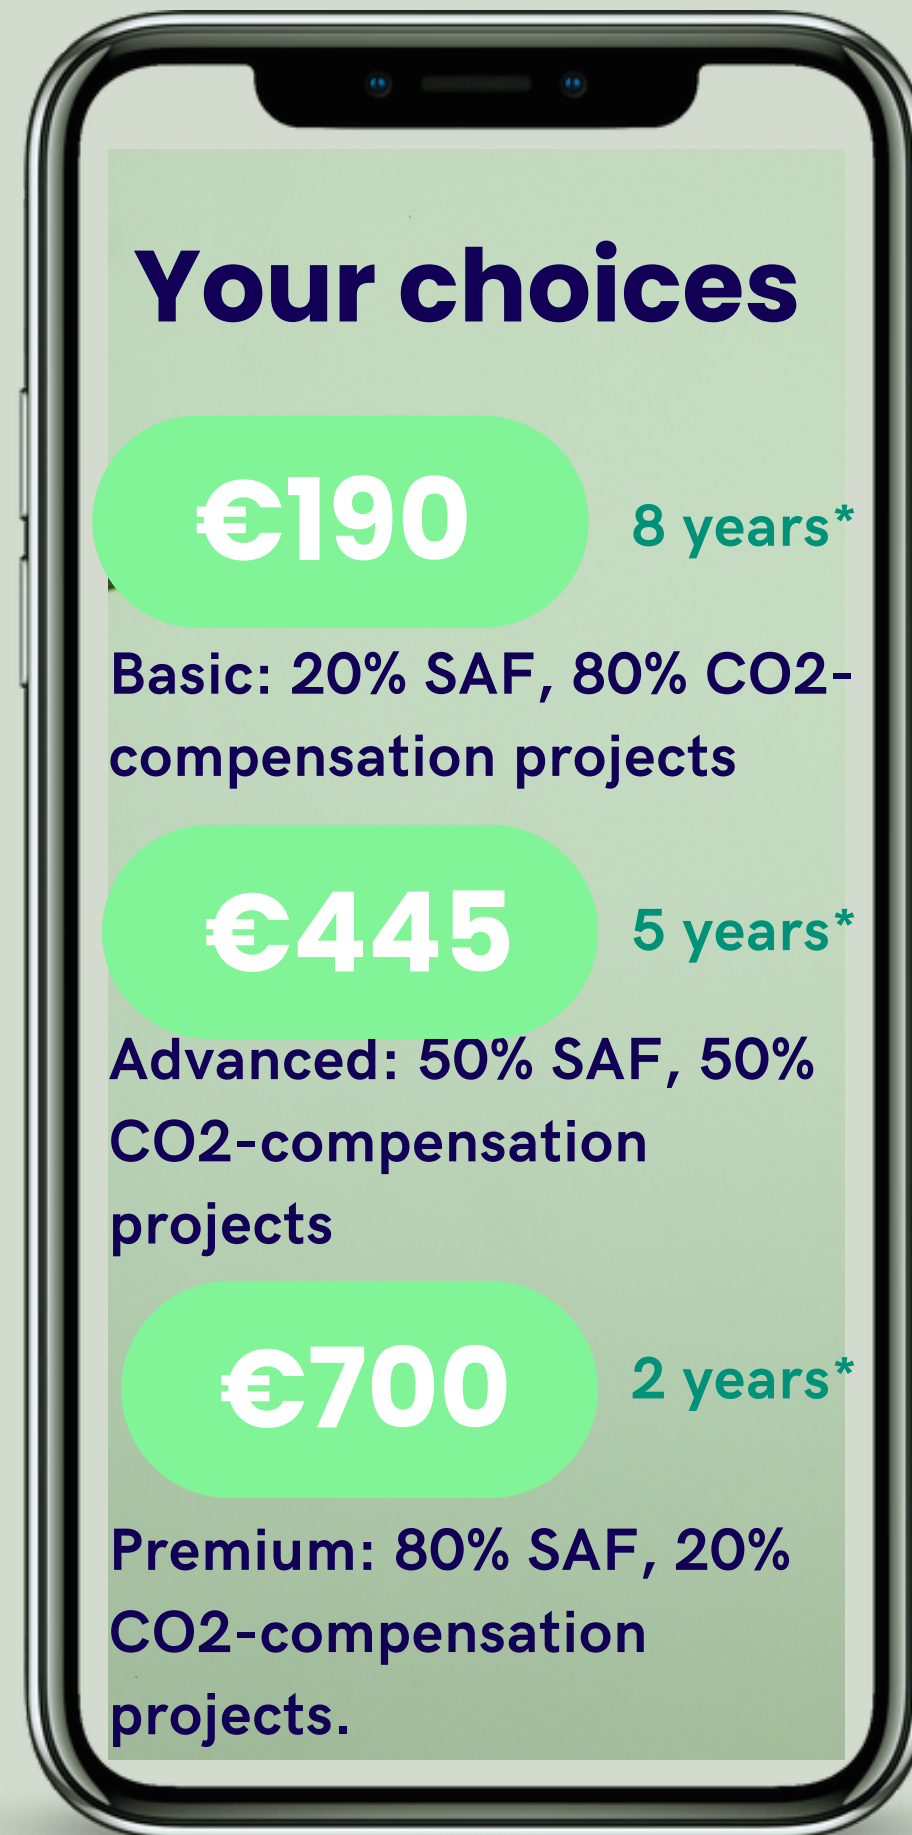

**Make your choice now on your individual compensation package ...**

and help us to jointly reduce the negative effects of air travels on the environment.

\*timeline for complete compensation of the travel itinerary for the respectively chosen compensation package.

Go back to your booking ...

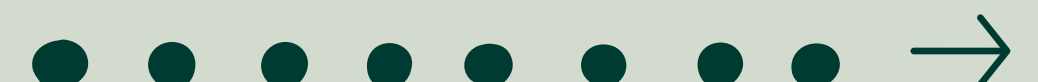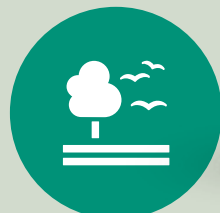

Supplement: MOESM3 [file 27019196]
