# Supplementary material for: Explaining sustainable purchase behavior in online flight booking—combining value-belief-norm model and theory of planned behavior
Source: Springer Nature journal article supplement (doi:10.1007/s11612-024-00735-7), 2024-04-25

# YOUR ITINERARY AT A GLANCE:

Almost ready for take-off – but before we think you should know, that we're doing our utmost to make your travels as sustainable as possible. But we need your support for this.

All information on **SAF** can be found here:

[Here](#)

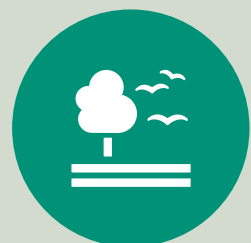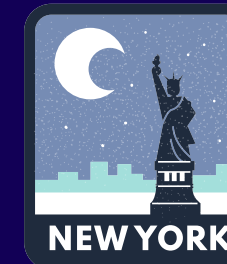

ORIG. TRIP

FRA

**NEW YORK**  
USA

FLIGHT NO.

LH400

DATE

MAR23

90-46-28

New York

90-46-28

## Your itinerary at a glance



**Your Cart**



---

**Flight Details**

Frankfurt - New York  
New York - Frankfurt

---

**Total in EUR      770EUR**

**Flight emissions**

|                 | CO2          |
|-----------------|--------------|
| Frankfurt - NYC | 387kg        |
| NYC - Frankfurt | 387kg        |
| <b>Total</b>    | <b>775kg</b> |



**Your choices**

**€130** 8 years\*

Basic: 20% SAF, 80% CO2-compensation projects

**€300** 5 years\*

Advanced: 50% SAF, 50% CO2-compensation projects

**€480** 2 years\*

Premium: 80% SAF, 20% CO2-compensation projects

**Make your choice now on your individual compensation package ...**

and help us to jointly reduce the negative effects of air travels on the environment.

\*timeline for complete compensation of the travel itinerary for the respectively chosen compensation package.

Go back to your booking ...

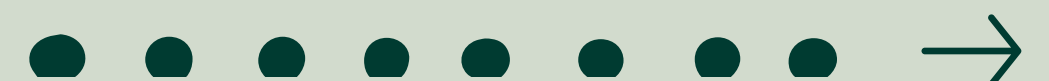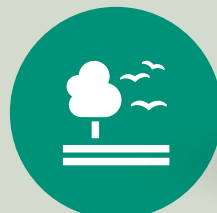

Supplement: MOESM2 [file 27019196]
