# Supplementary material for: Explaining sustainable purchase behavior in online flight booking—combining value-belief-norm model and theory of planned behavior
Source: Springer Nature journal article supplement (doi:10.1007/s11612-024-00735-7), 2024-04-25

# YOUR ITINERARY AT A GLANCE

Almost ready for take-off – but before we think you should know, that we're doing our utmost to make your travels as sustainable as possible. But we need your support for this.

All information on **SAF** can be found here:

[Here](#)

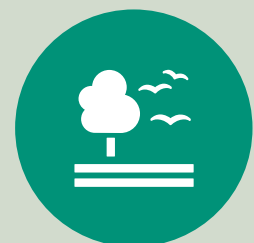A graphic of a dark blue luggage tag with a white circular hole at the top. The tag features a small icon of a traditional Korean pavilion in Seoul, South Korea, and a box indicating the original trip as 'FRA'. The main text on the tag reads 'SEOUL SOUTH KOREA'. Below this, there is a table with flight details: 'LH712' and 'MAR23'. A large green number '90-46-28' is displayed twice, once in the middle and once at the bottom of the tag.

ORIG. TRIP  
**FRA**

**SEOUL**  
**SOUTH KOREA**

| FLIGHT NO.   | DATE         |
|--------------|--------------|
| <b>LH712</b> | <b>MAR23</b> |

**90-46-28**

**SEOUL**

**90-46-28**

## Your itinerary at a glance

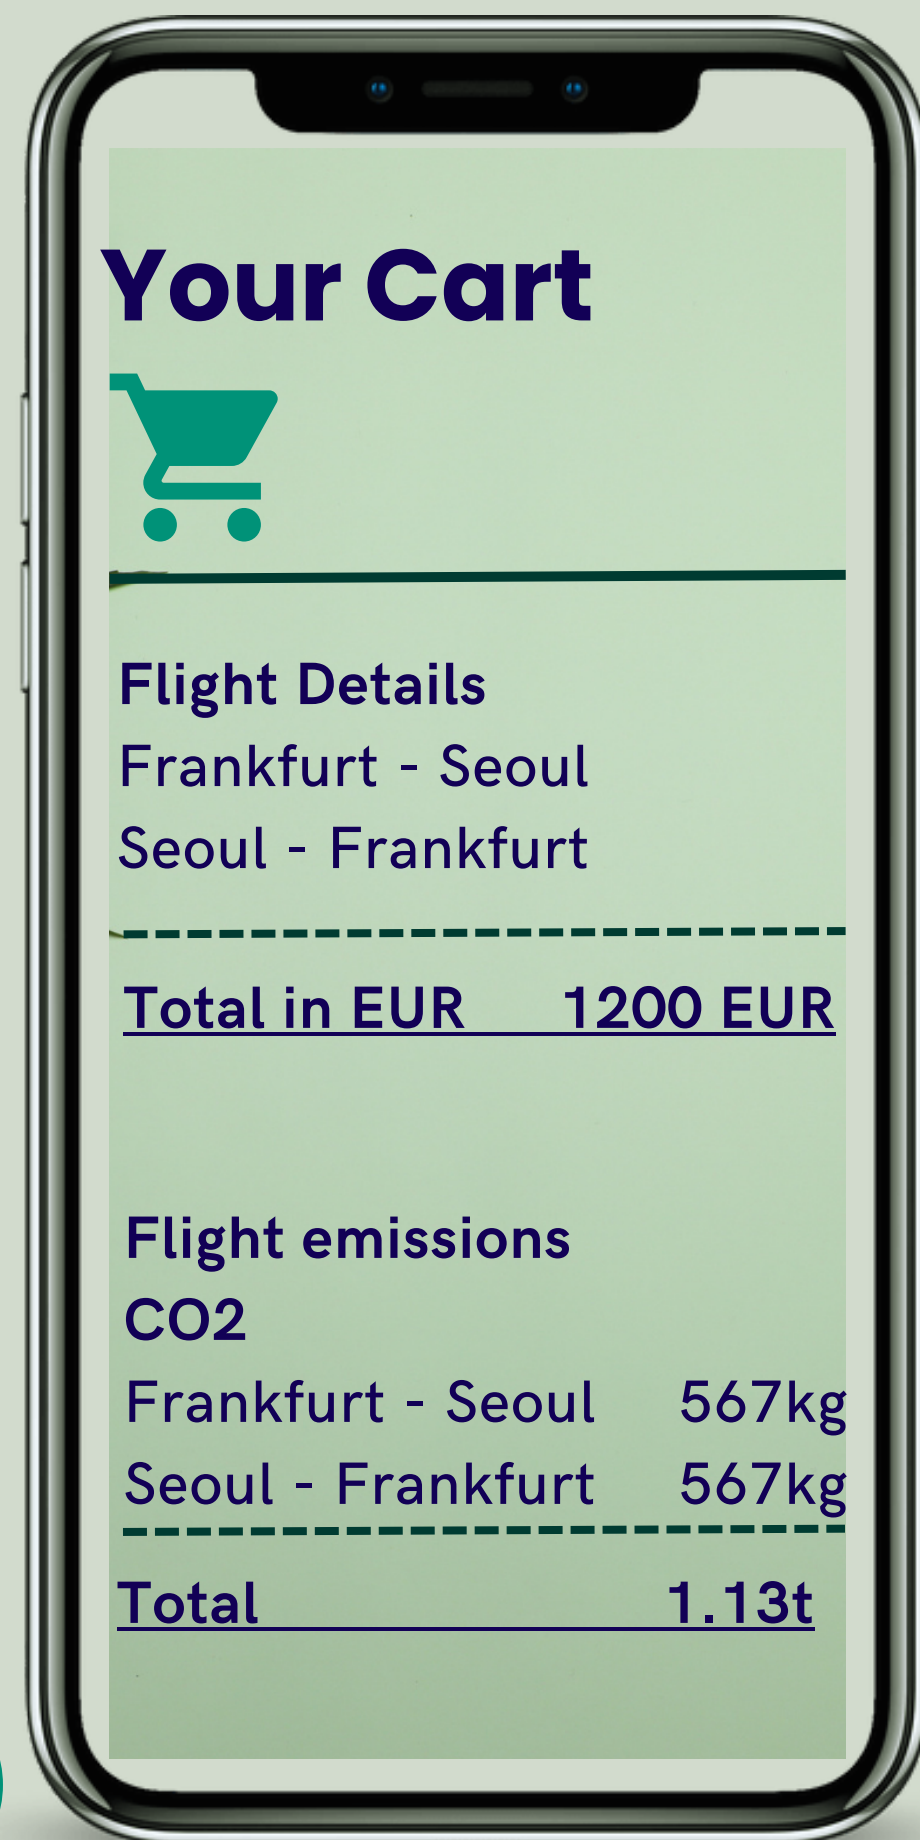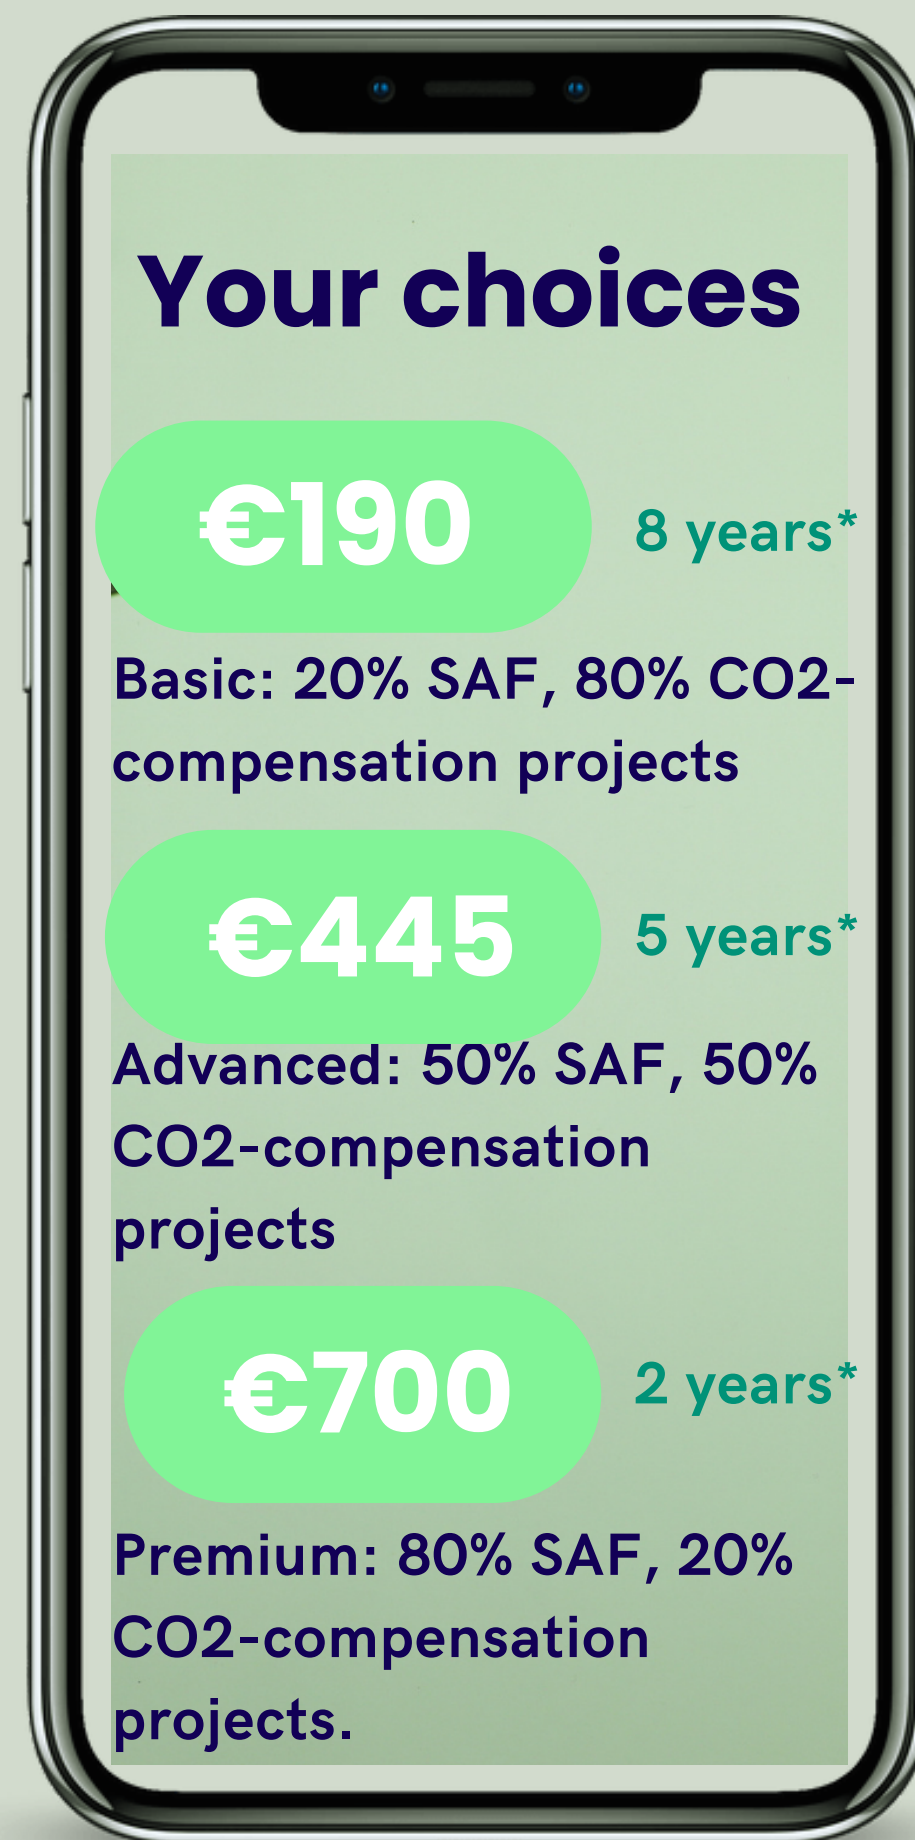

**Make your choice now on your individual compensation package ...**

and help us to jointly reduce the negative effects of air travels on the environment.

\*timeline for complete compensation of the travel itinerary for the respectively chosen compensation package.

Go back to your booking ...

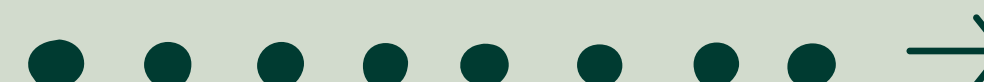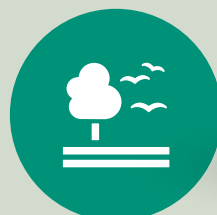

Supplement: MOESM4 [file 27019196]
